# Supplementary material for: The molecular epidemiology of Foot-and-Mouth Disease virus serotypes A and O from 1998 to 2004 in Turkey
Source: PubMed Central journal article supplement (PMC1698480; doi:10.1186/1746-6148-2-35), 2006-12-04
Supplement: 1746-6148-2-35-S1.pdf [file 1746-6148-2-35-S1.pdf]

# SLAC Analysis Results

## Nucleotide Model(010010) Fit Results

Log likelihood = -1787.09078680109

### Nucleotide substitution rate matrix

|   | A | C        | G        | T        |
|---|---|----------|----------|----------|
| A | * | 0.162401 | 1        | 0.162401 |
| C | - | *        | 0.162401 | 1        |
| G | - | -        | *        | 0.162401 |
| T | - | -        | -        | *        |

## Codon Model Fit Results

Log Likelihood = -1705.12560615312

Tree length (expected substitutions per site) = 0.341605

Global dN/dS = 0.167436

FOUND 1 POSITIVELY SELECTED SITES (0.3 significance level )

| Codon | dN-dS   | Normalized dN-dS | p-value  |
|-------|---------|------------------|----------|
| 151   | 2.00565 | 2.36703          | 0.287108 |

# REL Analysis Results

## Codon Model(010010) Fit Results

Log likelihood = -1678.99, AIC = 3453.97

### Nucleotide substitution rate matrix

|   | A | C        | G         | T        |
|---|---|----------|-----------|----------|
| A | * | 0.206492 | 1         | 0.175733 |
| C | - | *        | 0.0804541 | 0.694633 |
| G | - | -        | *         | 0.204151 |
| T | - | -        | -         | *        |

Total Tree Length in E[subst/site]:0.388528

### Fitted distributions.

| Synonymous (dS)             |           | Non-synonymous (dN)        |           | Non-syn and syn difference (dN-dS) |           |
|-----------------------------|-----------|----------------------------|-----------|------------------------------------|-----------|
| Rate                        | Weight    | Rate                       | Weight    | Rate                               | Weight    |
| 0.00000000                  | 0.0004947 | 0.00296214                 | 0.6655950 | -1.09329965                        | 0.6071497 |
| 0.00000000                  | 0.0873145 | 0.40204362                 | 0.3187059 | -0.69421817                        | 0.2907206 |
| 1.09626179                  | 0.9121909 | 3.35760707                 | 0.0156078 | 0.00296214                         | 0.0584453 |
|                             |           | 10.26474971                | 0.0000913 | 0.40204362                         | 0.0279853 |
|                             |           |                            |           | 2.26134528                         | 0.0142373 |
|                             |           |                            |           | 3.35760707                         | 0.0013705 |
| Mean = 1                    |           | Mean = <b>0.183447</b>     |           | 9.16848792                         | 0.0000833 |
| Variance = <b>0.0962618</b> |           | Variance = <b>0.203445</b> |           | 10.26474971                        | 0.0000080 |
|                             |           |                            |           | Mean = <b>-0.816553</b>            |           |
|                             |           |                            |           | Variance = <b>0.299707</b>         |           |

FOUND 2 POSITIVELY SELECTED SITES (50 significance level )

| Codon | E[dS]   | E[dN]   | Normalized E[dN-dS] | Posterior{dN>dS} | Bayes Factor{dN>dS} |
|-------|---------|---------|---------------------|------------------|---------------------|
| 9     | 1.08312 | 3.36074 | 5.86219             | 0.980094         | 432.862             |
| 151   | 1.01061 | 3.2524  | 5.76997             | 0.96414          | 236.372             |
