# Supplementary material for: The molecular epidemiology of Foot-and-Mouth Disease virus serotypes A and O from 1998 to 2004 in Turkey
Source: PubMed Central journal article supplement (PMC1698480; doi:10.1186/1746-6148-2-35), 2006-12-04

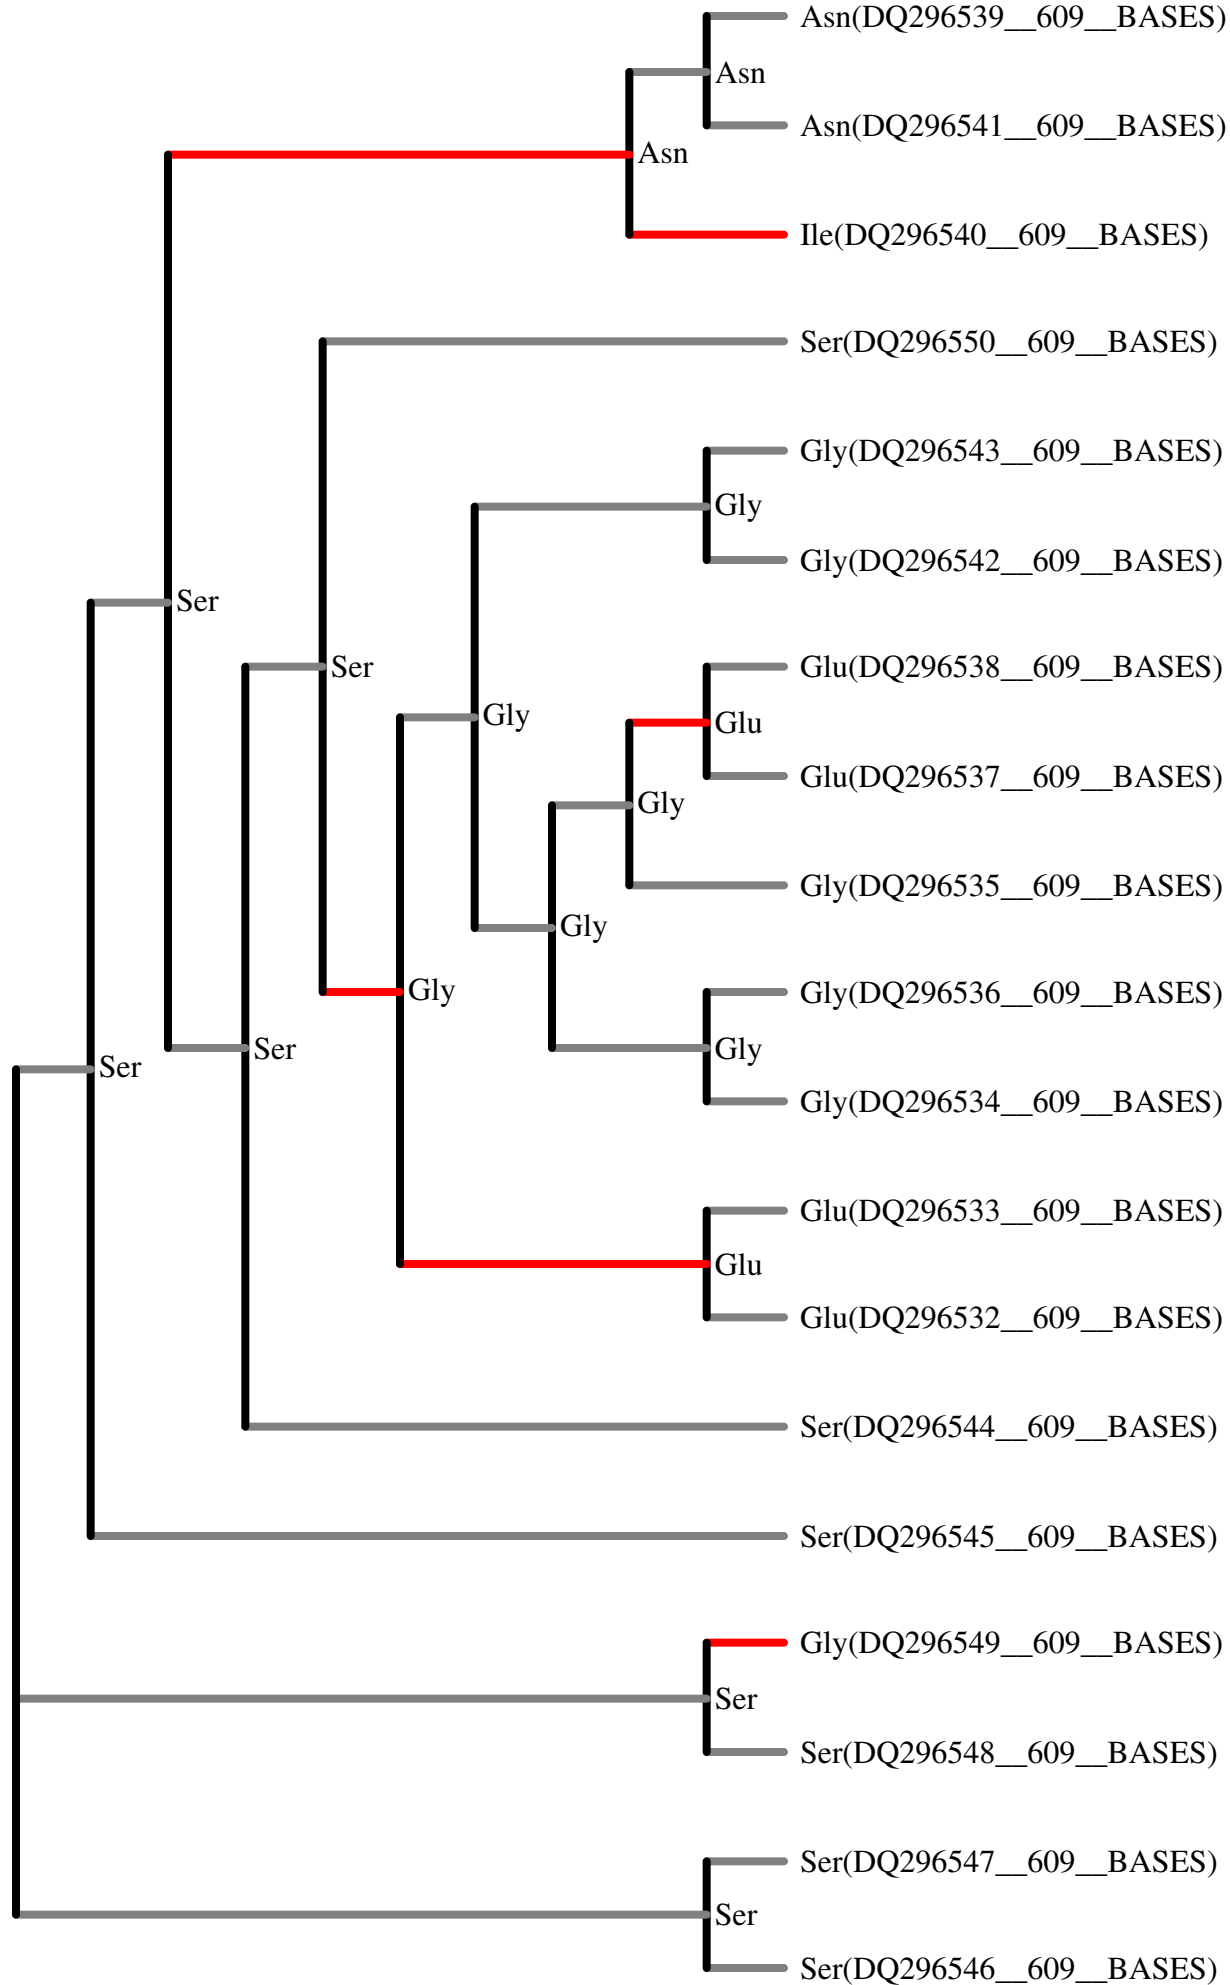

Supplement: 1746-6148-2-35-S3.pdf [file 1746-6148-2-35-S3.pdf]
